1 **Heterochromatin protein 1 (HP1) is intrinsically required for post-**  
2 **transcriptional regulation of *Drosophila* Germline Stem Cell (GSC) maintenance**

3 Assunta Maria Casale<sup>1</sup>, Ugo Cappucci<sup>1</sup>, Laura Fanti<sup>1</sup> & Lucia Piacentini<sup>1, \*</sup>

4

5 <sup>1</sup>Department of Biology and Biotechnology “C. Darwin”, Sapienza University of Rome, 00185

6 Rome, Italy and Istituto Pasteur Italia, Fondazione Cenci-Bolognetti, 00185 Rome, Italy

7 \*Corresponding author: Email: [lucia.piacentini@uniroma1.it](mailto:lucia.piacentini@uniroma1.it)

8

9

10

11

12

13

14

15

16

17

18

19

20

21

22

23

24

25

26 **Abstract**

27

28 A very important open question in stem cells regulation is how the fine balance between GSCs self-  
29 renewal and differentiation is orchestrated at the molecular level. In the past several years much  
30 progress has been made in understanding the molecular mechanisms underlying intrinsic and  
31 extrinsic controls of GSC regulation but the complex gene regulatory networks that regulate stem  
32 cell behavior are only partially understood. HP1 is a dynamic epigenetic determinant mainly  
33 involved in heterochromatin formation, epigenetic gene silencing and telomere maintenance.  
34 Furthermore, recent studies have revealed the importance of HP1 in DNA repair, sister chromatid  
35 cohesion and, surprisingly, in positive regulation of gene expression. Here, we show that HP1 plays  
36 a crucial role in the control of GSC homeostasis in *Drosophila*. Our findings demonstrate that HP1  
37 is required intrinsically to promote GSC self-renewal and progeny differentiation by directly  
38 stabilizing the transcripts of key genes involved in GSCs maintenance.

39

40

41

42

43

44

45

46

47

48

49

## 50 **Introduction**

51 Stem cells are undifferentiated cells defined by their unique capacity to maintain self-renewing  
52 potential at every cell division, while producing differentiating daughter cells to ensure the correct  
53 development and maintain tissues homeostasis<sup>1-3</sup>. A better understanding of stem cells biology will  
54 not only reveal the crucial molecular mechanisms that control the formation and maintenance of  
55 tissues, but will also influence stem cell-based therapies in regenerative medicine<sup>2,4,5</sup> and cancer  
56 treatments<sup>6</sup>.

57 In view of this, deepening the molecular mechanisms that control the fine balance between stem  
58 cell self-renewal and differentiation represents one of the fundamental goals of stem cell biology.  
59 This balance often depends on the coordinated regulation of complex transcriptional and post-  
60 transcriptional hierarchies.

61 The best way to investigate the molecular basis of stem cell regulation involves *in vivo* approaches,  
62 in the whole organism, since the removal of stem cells from the contexts of their "niches", in tissue  
63 cultures, could irreversibly change their properties<sup>7</sup>. In this context, the *Drosophila* ovarian  
64 germline stem cells (GSCs) represent an excellent and attractive model system to study the  
65 molecular basis of adult stem cell behavior and regulation<sup>8-11</sup>.

66

67 The *Drosophila* ovary is composed of about 20 functional units called ovarioles<sup>12</sup>. The most  
68 anterior part of the ovarioles consist of a germarium, a structure containing two or three  
69 asymmetrically dividing germline stem cells each of which produce another self-renewing GSC that  
70 remains anchored to the stromal somatic cap cells and a cystoblast (CB) committed to differentiate  
71 to sustain the later stages of the oogenesis.

72 The CB undergoes four synchronous divisions with incomplete cytokinesis to produce a 16-cell  
73 germ line cyst<sup>12,13</sup> and steadily moves in a posterior direction through the germarium. Of these, one  
74 cell will differentiate into an oocyte, while the remaining cells will become polyploidy nurse cells<sup>14</sup>.

75 The 16 cells cyst becomes surrounded by a monolayer of follicle cells and buds off from the

76 posterior germarium to form an egg chamber<sup>15,16</sup> which ultimately gives rise to a single mature  
77 oocyte ready for fertilization.

78

79 The activity of GSCs is controlled by extrinsic and intrinsic signaling pathways that finely regulate  
80 the balance between stem cell self-renewal and differentiation through the coordination of complex  
81 transcriptional and post-transcriptional hierarchies.

82 Decapentaplegic (Dpp) and Glass bottom boat (Gbb) are produced from the somatic niche and  
83 activate bone morphogenetic protein (BMP) signaling in the GSC to directly repress the Bam-  
84 dependent differentiation pathway and to maintain GSC identity<sup>17-20</sup>. Besides extrinsic mechanisms,  
85 stem cell intrinsic programs are crucial to control the binary germ line cell fate in *Drosophila*.

86 Nanos and Pumilio are intrinsic factors essential to maintain stem cell identity<sup>21-23</sup>. They are key  
87 components of an evolutionarily conserved translational repressor complex<sup>24-28</sup> that bind to specific  
88 recognition sequences in the 3'untranslated regions (3'UTRs) of differentiating mRNAs to repress  
89 their translation<sup>24,29,30</sup>.

90 Other intrinsic factors necessary for GSC maintenance include components of the microRNA  
91 (miRNA) silencing machinery, indicating a central role for miRNA-dependent gene silencing in  
92 GSC identity<sup>31-34</sup>. Additionally, many genes involved in piRNA pathway appear to be crucial for  
93 proper GSC lineage development in *Drosophila*<sup>22,35-38</sup>.

94 A fast-growing body of experimental data provide strong evidences that also epigenetic  
95 mechanisms involving chromatin architecture and histone modification are equally important for  
96 the regulation of GSC maintenance and differentiation in *Drosophila*<sup>39-43</sup>. For example, the  
97 chromatin remodeling factor Iswi and the putative transcription factor Stonewall are intrinsically  
98 required for GSC maintenance<sup>39-43</sup>. The H3K4 demethylase Lsd1 controls non-autonomously the  
99 germ cell differentiation presumably through repressing *dpp* expression<sup>41</sup>. Moreover, other

100 interesting studies show that the histone H2B ubiquitin protease Scrawny (Scny)<sup>40</sup> and the histone  
101 H3K9 trimethylase Eggless (Egg) are required for maintaining self-renewal of GSC<sup>42</sup>.

102 Although different experimental evidence confirms the relevance of epigenetic regulatory programs  
103 in the GSC regulation, a complete picture of such mechanisms is still far to be resolved.

104

105 Heterochromatin protein 1 (HP1) is an evolutionarily conserved multifunctional epigenetic adaptor  
106 that is involved in heterochromatin formation and epigenetic gene silencing in different species  
107 including humans<sup>44-46</sup>. In addition to its role in heterochromatin structural organization, emerging  
108 evidence in *Drosophila* and mammals has highlighted the importance of HP1 in telomere capping,  
109 telomere length homeostasis<sup>47,48</sup> and, more surprisingly, in positive regulation of gene expression<sup>49-</sup>  
110 <sup>54</sup>.

111 A recent study showed that HP1 and Su(var)3-9 are both necessary for GSC maintenance and that  
112 HP1 is sufficient for GSC self-renewal in *Drosophila* testis<sup>55</sup>. It has also been demonstrated that  
113 planarian HP1, induced upon injury, is able to promote regenerative proliferation of adult stem  
114 cells<sup>56</sup>. In mice, loss of HP1 gamma significantly reduces the number of primordial germ cells  
115 (PGCs) by regulating their cell cycle progression<sup>57</sup>. Moreover, HP1 gamma is essential for male  
116 germ cell survival and spermatogenesis<sup>58</sup>. Recently, a large-scale RNAi screen in *Drosophila*  
117 female germline stem cells identified HP1 as potentially involved in oogenesis<sup>59</sup> even though the  
118 precise molecular mechanisms by which it exerts its function still remain elusive and need to be  
119 defined.

120 Here, we report our experiments showing an important function for *Drosophila* HP1 in female  
121 gametogenesis. In this study, we establish that HP1 is necessary for *Drosophila* oogenesis and is  
122 required cell autonomously to control the fine balance between stem cell self-renewal and  
123 differentiation. Finally, we show that HP1 exerts its functions, positively regulating the stability of  
124 key mRNAs involved in the control of female germ line stem cells development.

125

126

127

## 128 **Results and Discussion**

### 129 **Functional inactivation of HP1 by *in vivo* RNA interference (RNAi) causes severe germ line** 130 **defects that result in agametic ovarioles and female sterility**

131 HP1 is a protein constitutively expressed in almost all larval and adult tissues with highest  
132 enrichment in adult ovaries (flybase.org). Immunostaining experiments performed by a specific  
133 anti-HP1 antibody on wild type ovaries, showed that HP1 localizes in the nucleus of both somatic  
134 and germline cells, from the anterior tip of the germarium (GSCs and CBs) until late stages of  
135 oogenesis (Fig. 1a). Specifically, HP1 immunosignals were mainly detected in dense pericentric  
136 heterochromatic foci in all germarium and developing egg chamber cells; HP1 also accumulated in  
137 the germinal vesicle and on the karyosome of the oocyte (Fig. 1a). HP1 was particularly enriched  
138 within and next to heterochromatic regions also in larval and pupal gonads (Supplementary Fig.  
139 S1).

140

141 Since homozygous HP1 mutants die at third instar larvae, to investigate *in vivo* the function of HP1  
142 in adult female germline, we took advantage of the Gal4-UAS binary system<sup>60</sup>. We performed  
143 tissue-specific HP1 knockdown by independently crossing two different transgenic lines carrying  
144 HP1 short small hairpin RNAs (shRNA)<sup>61</sup> under the control of Gal4-responsive UAS promoter,  
145 with nanos-Gal4-NGT (hereafter referred as nos-Gal4) that provides a robust and uniform Gal4  
146 expression in the germarium<sup>62</sup>. We found that the functional inactivation of HP1 in the F1 female  
147 progeny resulted in complete sterility thus suggesting an essential role for HP1 in female  
148 gametogenesis.

149

150 In order to further investigate the molecular basis underlying this female sterility, ovaries from *nos-*  
151 *Gal4>HP1<sup>RNAi</sup>* females ranging from 1- to 15-day-old, were dissected and immunostained with a  
152 specific antibody against Vasa, a DEAD-box RNA helicase which is a well-characterized marker of  
153 germ cells lineage in insects and vertebrates<sup>63,64</sup>. We found that knocking down HP1 upon nos-Gal4

154 driver expression (Supplementary Fig. S2), resulted in ovaries that were completely agametic (Fig.  
155 1b, c) as compared to control ovaries (Fig. 1d); 86% of HP1 depleted germaria from 0- to 1-day-old  
156 females were completely devoid of germ cells (Fig. 1b) whereas 14% contained only a few germ  
157 cells at the tip of the ovariole (less than 10 per germarium) and one or two abnormal egg chambers  
158 (Fig. 1c) (n = 250 ovaries). From 5- to 15-day-old females, all the HP1 depleted ovaries exhibited a  
159 typical germline less morphology confirmed by the total absence of Vasa-positive cells (data not  
160 shown).

161 These findings strongly suggest for HP1 a specific and crucial role in germ line stem cell  
162 maintenance and differentiation; we could not, however, completely exclude a general role for HP1  
163 in cell viability.

164 To discriminate between these possibilities, we knocked down HP1 with a maternal tubulin (Mat)  
165 Gal4 that induces transgenic expression of short hairpin RNAs against HP1 outside the germarium,  
166 starting in stage 2<sup>65</sup> (Supplementary Fig. S3a, b). We found that HP1 knockdown females were  
167 fertile and showed no obvious oogenesis defects (Supplementary Fig. S3c) thus suggesting for HP1  
168 an essential and cell autonomous function in early oogenesis and not a general requirement for cell  
169 survival.

170

### 171 **HP1 is required during multiple processes in early oogenesis**

172 Germ cell-specific knockdown of HP1 causes almost complete loss of germ cells before adulthood.  
173 In order to determine the phenocritical period for HP1 requirement during normal oogenesis, we  
174 cytologically examined larval and pupal HP1 depleted ovaries following the germ cells fate, starting  
175 from early stages of germ-cell development to adulthood (Fig. 2 and Supplementary Fig. S4)  
176 Vasa staining analysis showed that larval ovaries from *nos-Gal4>HP1<sup>RNAi</sup>* females displayed a  
177 normal cellular organization as compared to control; consistent with this the total number of PGCs  
178 resulted unaffected (*nos-G4/+*,  $107.5 \pm 8.5$ ; *nos-G4>HP1<sup>RNAi</sup>*,  $106.6 \pm 7.0$ ) (Fig. 2a).

179 On the contrary, HP1 depleted pupal ovaries were almost completely devoid of differentiated egg  
180 chambers when compared to the control pupal gonads (Fig. 2b).

181 Taken together, these findings suggest that HP1 is required during the earliest stages of oogenesis at  
182 the larval/pupal transition when GSCs are established<sup>66</sup>.

183

184 In order to gain a more complete understanding of the altered phenotypes observed in pupal ovaries  
185 and to better investigate how HP1 regulates the behavior of germ cells, we performed an accurate  
186 cytological analysis on *nos-Gal4>HP1<sup>RNAi</sup>* pupal ovaries. We performed double-immunostaining  
187 experiments with antibodies against Vasa and  $\alpha$ -Spectrin;  $\alpha$ -Spectrin is a cytoskeletal protein that  
188 specifically labels spectrosomes and fusomes and can be used to trace the germline differentiation.  
189 Spectrosomes are spherical and mark GSCs and cystoblasts, whereas fusomes are branched and  
190 mark 2, 4, 8, and 16-cell cysts<sup>67</sup>.

191 The results of this cytological analysis (152 ovarioles scored) demonstrated that HP1 depleted pupal  
192 ovaries exhibited several remarkable and complex phenotypes including: empty germaria (27%,  
193 n=41 ovarioles), germaria with germ cells containing spectrosomes only (33%, n=51 ovarioles),  
194 germaria with germ cells containing both spectrosomes and fusomes carrying a single developing  
195 cyst connected by an incompletely branched fusome (26%, n=39 ovarioles) and germaria with few  
196 germ cells containing only fusomes (14%, n=21 ovarioles) (Fig. 3a, b).

197 These complex phenotypic defects suggest for HP1 a functional role in regulating the germline stem  
198 cell (GSC) maintenance.

199 We asked whether the low number of germ cells in HP1 depleted ovarioles could be related to  
200 defects in the division rate of ovarian stem cells and their progeny. These defects might contribute  
201 to germ line cells loss over time. In order to verify the capacity of germ cells to undergo mitotic  
202 divisions, we immunostained wild type and HP1 knockdown ovaries with a specific antibody to  
203 phosphorylated H3S10 (phospho-H3, PH3) to detect germline cells undergoing mitosis at a given  
204 time (Fig. 3c). In HP1 depleted ovaries we observed an almost complete loss of PH3 positive nuclei



205 (5%, n=56 ovarioles) respect to the control ovaries (35%, n=46 ovarioles) (Fig. 3d); this result  
206 establishes that the functional inactivation of HP1 severely impairs the correct germ cells division.  
207 We also assessed apoptosis by using anti-cleaved Caspase-3 antibody that is a proven marker for  
208 cells that are dying. The results clearly indicated that the few remaining germline cells detected in  
209 HP1 depleted ovaries are strongly stained with cleaved Caspase-3 suggesting that the germ cells  
210 that fail to properly divide die prematurely (Fig. 3e).

211

212 **HP1 promotes germ cell differentiation by post-transcriptionally regulating *bam* expression**  
213 **and function**

214 Germline division defects are often associated to an altered differentiation program.  
215 Previous studies demonstrated that Bag of Marbles (Bam) protein is necessary and sufficient for  
216 promoting GSC and cystoblasts differentiation, since *bam* mutations completely block germ cell  
217 differentiation (causing GSC hyperplasia), whereas *bam* ectopic expression in GSCs results in their  
218 complete and precocious differentiation<sup>18,68,69</sup>.

219 To determine whether the phenotypic defects observed in HP1 depleted pupal ovaries could be  
220 related to *bam* repression, we firstly evaluated, by quantitative real-time PCR (qRT-PCR), the  
221 expression of *bam* gene in HP1 knockdown pupal ovaries. We found that ovaries lacking HP1  
222 exhibited a significant reduction of *bam* transcript levels (close to about 80%) as compared to  
223 control ovaries (Fig. 4a).

224 Consistent with the down regulation of *bam* mRNAs, we also observed a drastic diminution of Bam  
225 protein by immunostaining with a specific monoclonal antibody against Bam (Fig. 4b). In wild type  
226 ovaries, Bam protein was detected, as expected, in cystoblasts and early developing cysts (2-, 4-,  
227 and 8-cell cysts) whereas in HP1 mutant ovaries Bam protein was almost undetectable (Fig. 4b).

228 Altogether, these data strongly suggest that HP1 blocks Bam driving germ cell differentiation.

229 Previously we have demonstrated that in *Drosophila* HP1 takes part in positive regulation of gene  
230 expression by stabilizing RNA transcripts and protecting them against premature and rapid

231 degradation<sup>53</sup>; in particular, we found that HP1 is able to directly bind the transcripts of more than  
232 one hundred euchromatic genes in *Drosophila* and physically interacts with DDP1<sup>70</sup>, HRB87F<sup>71</sup>  
233 and PEP<sup>72</sup>, which belong to different classes of heterogeneous nuclear ribonucleoproteins (hnRNPs)  
234 that are known to be involved in RNA packaging, stability and processing. Moreover, in our  
235 previous work we also demonstrated that HP1 is cotranscriptionally recruited on nascent transcripts  
236 through its chromodomain<sup>49,53</sup>.

237

238 In order to verify if HP1 was directly involved in post-transcriptional regulation of *bam* gene by  
239 binding *in vivo* its mRNA, we performed HP1 CLIP (UV cross-linking and immunoprecipitation)  
240 experiments<sup>73,74</sup> on whole adult ovaries dissected from 0- to 1-day-old-wild type females.

241 The results of RT-PCR from HP1 CLIP experiments clearly showed that *bam* transcripts were  
242 significantly enriched in the CLIP sample when compared to the mock control sample (Fig. 4c) and  
243 demonstrated that HP1 is able to specifically bind *bam* transcripts *in vivo*.

244 In order to further investigate whether HP1 is cotranscriptionally recruited on *bam* nascent  
245 transcripts, we performed ChIP experiments on cross-linked chromatin purified from 0- to 1-day-  
246 old wild-type ovaries. To evaluate the presence of *bam* sequences among the immunoprecipitated  
247 DNA, a PCR analysis was performed with specific primer pairs covering both the promoter and the  
248 coding regions of *bam* gene.

249 The results of ChIP assays demonstrated that HP1 is clearly associated to *bam* gene (Fig. 4d). To  
250 completely exclude any direct role for HP1 on *bam* transcriptional control and to confirm that HP1  
251 binding on *bam* gene was exclusively mediated by the presence of *bam* nascent transcripts, ChIP  
252 experiments were repeated in presence of RNaseA/T1 mix that specifically degrades single stranded  
253 RNA (ssRNA). The RNase-ChIP results demonstrated that chromatin RNase treatment prior to  
254 immunoprecipitation completely remove HP1 from *bam* gene thus confirming that the recruitment  
255 of HP1 on *bam* gene is clearly RNA-dependent (Fig. 4d). RNase treatment did not affect, as

256 expected, the HP1 occupancy over Het-A telomeric retrotransposon (Fig. 4d) since, at the  
257 telomeres, HP1 is capable to directly bind HeT-A sequences through its hinge domain<sup>48</sup>.  
258 To determine the stability of *bam* transcripts, we analyzed, by qRT-PCR, RNA samples purified  
259 from wild type and HP1 knockdown ovaries treated with Actinomycin D to inhibit transcription and  
260 *de novo* RNA synthesis. Previous analysis showed that a 30 min treatment was sufficient to inhibit  
261 transcription in the ovaries<sup>75</sup>. As shown in Figure 4e, in HP1 lacking ovaries we observed a strong  
262 and rapid decay rate of *bam* transcript when compared to the control (Fig. 4e).  
263 These observations strongly suggest that HP1 may regulate *bam* mRNAs in a post-transcriptional  
264 manner.  
265 To confirm our findings and to verify if HP1 can effectively control germ cells differentiation in a  
266 *bam*-dependent manner, we overexpressed *bam* from a heat shock inducible transgene carrying the  
267 full-length *bam* cDNA<sup>68</sup> in the HP1 knockdown germ cells. To assess the effectiveness of *hs-bam*  
268 transgene expression we analyzed *bam* mRNA and protein in HP1 depleted ovaries with or  
269 without heat-shock (Supplementary Fig. S5).  
270 *Nos-Gal4 /UAS-HP1<sup>RNAi</sup>; P[hs-bam]/+* and *nos-Gal4 /HP1<sup>RNAi</sup>; +/+* females were heat-shocked at  
271 pupal stage (96 hours) at 37 °C for 1 hour and, 24 hours after heat shock (HS) treatment, adult  
272 ovaries were dissected and stained with anti-Vasa antibody (Fig. 5a, b). As showed in Figure 5b,  
273 heat-shock induced *bam* can only partially rescue the phenotypic defects induced by HP1  
274 knockdown since its forced expression under control of the heat shock promoter generates only few  
275 normally developed egg chambers (see Fig. 5c for quantification of ovarioles containing developing  
276 egg chambers in heat shocked HP1 depleted females carrying the *P[hs-bam]* transgene). This  
277 finding suggests that oogenesis defects observed in HP1 depleted ovaries may be only partially  
278 imputable to defective differentiation mechanisms.  
279 It is well known that loss of *bam* blocks germ cell differentiation resulting in GSC hyperplasia<sup>68</sup>, a  
280 characteristic phenotype that we never observed in HP1 depleted ovaries by *nos-Gal4*.

281 Altogether, these findings strongly suggest that the complex phenotypic defects arising from HP1  
282 knockdown in the female germline are only partially dependent on *bam* repression and are probably  
283 due to a duplex coordinated control operated by HP1 in both GSCs self-renewal and differentiation.  
284 In order to verify this hypothesis we inactivated HP1 only in Bam-expressing germline cells by  
285 using P{bam promoter-Gal4:VP16}<sup>17</sup> that drives the expression of shHP1 only in the dividing  
286 cystoblast and cystocytes but not in GSCs where the function of HP1 protein remains completely  
287 wild-type. In this case, we observed the classical ovarian tumor phenotype (Fig. 5d) albeit at very  
288 low frequency (less than 1%) due to the low effectiveness of bam-Gal4 driver in knocking down  
289 HP1 protein (Supplementary Fig. S6).

290

### 291 **HP1 controls GSCs self-renewal by post-transcriptional regulation of stemness genes**

292 Consistent with the conclusion stated above, we wondered if HP1 was able to post-transcriptionally  
293 regulate also key stemness genes. First, we analyze by qRT-PCR the expression profiles of some  
294 important genes that are intrinsically involved in GSCs self-renewal by repressing Bam  
295 differentiation pathways<sup>76-78</sup>.

296 We found that some of them as *nos*, *cup*, *piwi* and *vasa* were significantly down regulated in HP1  
297 knockdown pupal ovaries respect to the control (Fig. 6a). These results allowed us to hypothesize  
298 that also *nos*, *cup*, *piwi* and *vasa* genes might be post-transcriptionally regulated by HP1. So we  
299 dissected ovaries from 0- to 1-day-old wild type females to repeat both CLIP and CHIP  
300 experiments. CLIP-PCR analysis, clearly showed that *nos*, *cup* and *piwi* RNAs were significantly  
301 enriched in the IP sample respect to the mock control sample whereas *vasa* mRNA did not (Fig.  
302 6b). These genes resulted strongly enriched also in CHIP IP sample but not in RNase-CHIP IP  
303 sample (Fig. 6c) indicating that their RNAs are co-transcriptionally bound by HP1. To determine  
304 the mRNA decay of these genes, we repeated the Actinomycin D treatment that allowed us to  
305 conclude that HP1 is able to stabilize *nos*, *cup* and *piwi* mRNAs (Fig. 6d).

306 Altogether, these data strongly indicate that HP1 is intrinsically required for post-transcriptional  
307 regulation of *Drosophila* GSC maintenance. Our findings suggest that HP1 exerts its function  
308 through the formation of an HP1-containing hnRNP nuclear complex that protects and stabilizes  
309 key mRNAs involved in the control of GSC homeostasis and behavior. Intriguingly there are  
310 different experimental evidences demonstrating that also mutations in genes coding for the HP1-  
311 interacting hnRNPs DDP1, HRB87F and PEP induce female-sterile phenotypes<sup>79-81</sup>. For example,  
312 the hypomorphic insertional allele of DDP1 (*Dp1<sup>15.1</sup>*) causes complete sterility in females but not in  
313 males. Homozygous *Dp1<sup>15.1</sup>* females show abnormal ovaries with ovarioles undeveloped, egg  
314 chambers often fused and containing an irregular number of cells<sup>79</sup>; finally, also PEP and HRB87F  
315 are essential for normal gonadal development and female fecundity<sup>80,81</sup>.

316 In conclusion, the above results demonstrate, for the first time, an essential role for HP1 in post-  
317 transcriptional regulation of GSC maintenance and certainly add a new dimension to our  
318 understanding of HP1 targeting and functions in epigenetic regulation of GSC behavior.

319

320

321

322

323

324

325

326

327

328

329

## 330 **Methods**

331

### 332 ***Drosophila* Strains**

333 All flies were raised at 24 °C on standard cornmeal-sucrose-yeast-agar medium.

334 For a detailed list of all stocks used in this study, see Supplementary Methods.

335

### 336 **Immunofluorescent staining of larval, pupal and adult whole-mount ovaries**

337 Pupal and adult ovaries were stained according to Grieder<sup>82</sup>.

338 Larval ovaries were dissected, fixed, and immunostained as described previously by Pisano<sup>83</sup>.

339 Further details can be found in Supplementary Methods.

340

### 341 **Western Blot analysis**

342 Protein extracts fractionated by 10% SDS-PAGE and electroblotted onto Immobilon-P

343 polyvinylidene difluoride membranes (Bio-rad) were probed with antibodies against HP1 (1:500, 9A9

344 monoclonal mouse),  $\alpha$ -Tubulin (mouse 1:2000, Sigma). Proteins of interest were detected with

345 HRP-conjugated goat anti-mouse or anti-rabbit IgG antibody (1:10000, Santa Cruz) and visualized

346 with the ECL Western blotting substrate (GE Healthcare), according to the provided protocol. The

347 chemiluminescence detection was performed on the ChemiDoc XRS+ System (Bio-rad) and

348 analyzed using the included ImageLab software.

349

### 350 **Cross-linking immunoprecipitation (CLIP) assay**

351 CLIP assay was performed as previously reported<sup>84</sup> with some modifications. Approximately 20 mg

352 ovaries from 0- to 1-day-old wild-type females were UV crosslinked ( $3 \times 2000 \mu\text{J}/\text{cm}^2$ ),

353 homogenized on ice in 1 mL RCB buffer (50 mM HEPES pH 7.4, 200 mM NaCl, 2.5 mM  $\text{MgCl}_2$ ,

354 0.1% Triton X-100, 250 mM sucrose, 1 mM DTT, 1 $\times$  EDTA-free Complete Protease Inhibitors, 1

355 mM PMSF) supplemented with 300 U RNaseOUT (Invitrogen) and placed on ice for 30 min. The

356 homogenate was sonicated on ice, at 80% power, five times in 20 s bursts with a 60 s rest in  
357 between using the Hielscher Ultrasonic Processor UP100H (100W, 30kHz) and centrifuged  
358 (16000xg for 5 min at 4 °C). Soluble extract was precleared with 20 µl Protein-G dynabeads  
359 (Invitrogen) for 20 min at 4 °C. After removal of samples for immunoblotting and quantitation of  
360 RNA input (1%), HP1 was immunoprecipitated with anti-HP1 9A9 antibody from 450 µl precleared  
361 extract by incubation for 4 h with 50 µl Protein-G dynabeads. Immunoprecipitates were washed 4  
362 times with RCB. To elute the immunoprecipitated RNAs, the pelleted beads were boiled in 100 µL  
363 of UltraPure DEPC-treated Water for 5 min. 900 µL Qiazol Reagent was added to the supernatant  
364 recovered for RNA preparation. The RNA purified was used as a template to synthesize cDNA  
365 using oligo dT, random hexamers and SuperScript reverse transcriptase III (Invitrogen) according to  
366 the manufacturer's protocol.

367

#### 368 **Chromatin immunoprecipitation assay**

369 Chromatin immunoprecipitation was performed according to the method described by Menet<sup>85</sup> with  
370 minor modifications. Approximately 20 mg ovaries from 0- to 1-day-old wild-type females were  
371 homogenized in 1 mL of NEB buffer (10 mM HEPES-Na at pH 8.0, 10 mM NaCl, 0.1 mM EGTA-  
372 Na at pH 8, 0.5 mM EDTA-Na at pH 8, 1 mM DTT, 0.5% NP-40, 0.5 mM Spermidine, 0.15 mM  
373 Spermine, 1× EDTA- free Complete Protease Inhibitors) with a Polytron homogenizer (Kinematica  
374 Switzerland) with a PT300 tip for 1 min (at 3000 rpm). The homogenate was transferred to a pre-  
375 chilled glass dounce (Wheaton) and 15 full strokes were applied with a tight pestle. Free nuclei  
376 were then centrifuged at 6000xg for 10 min at 4 °C. The nuclei-containing pellets were resuspended  
377 in 1 mL of NEB and centrifuged at 20000xg for 20 min on sucrose gradient (0.65 mL of 1.6 M  
378 sucrose in NEB, 0.35 mL of 0.8 M sucrose in NEB). The pellet was resuspended in 1 mL of NEB  
379 and formaldehyde to a final concentration of 1%. Nuclei were cross-linked for 10 min at room  
380 temperature and quenched by adding 1/10 vol of 1.375 M glycine. The nuclei were collected by  
381 centrifugation at 6000xg for 5 min. Nuclei were washed twice in 1 mL of NEB and resuspended in

382 1 mL of Lysis Buffer (15 mM HEPES-Na at pH 7.6, 140 mM NaCl, 0.5 mM EGTA, 1 mM EDTA  
383 at pH 8, 1% Triton X-100, 0.5 mM DTT, 0.1% Na Deoxycholate, 0.1% SDS, 0.5% N-  
384 lauroylsarcosine and 1× EDTA-free Complete Protease Inhibitors). Nuclei were sonicated using a  
385 Hielscher Ultrasonic Processor UP100H (100W, 30kHz) six times for 20 s on and 1 min on ice.  
386 Sonicated nuclei were centrifuged at 13000xg for 4 min at 4 °C. The majority of sonicated  
387 chromatin was 500 to 1000 base pairs (bp) in length. For each immunoprecipitation, 15 µg of  
388 chromatin was incubated in the presence of 10 µg of HP1 9A9 monoclonal antibody (3 h at 4 °C in  
389 a rotating wheel). Then, 50 µl of dynabeads protein G (Invitrogen) was added and incubation was  
390 continued overnight at 4 °C. The supernatants were discarded and samples were washed twice in  
391 Lysis Buffer (each wash 15 min at 4 °C) and twice in TE Buffer (1 mM EDTA, 10 mM TrisHCl at  
392 pH 8). Chromatin was eluted from beads in two steps; first in 100 µl of Elution Buffer 1 (10 mM  
393 EDTA, 1% SDS, 50mM TrisHCl at pH 8) at 65 °C for 15 min, followed by centrifugation and  
394 recovery of the supernatant. Beads material was re-extracted in 100 µl of TE + 0.67% SDS. The  
395 combined eluate (200 µl) was incubated overnight at 65 °C to reverse cross-links and treated by 50  
396 µg/ml RNaseA for 15 min at 65 °C and by 500 µg/ml Proteinase K (Invitrogen) for 3 h at 65 °C.  
397 Samples were phenol–chloroform extracted and ethanol precipitated. DNA was resuspended in 25  
398 µl of water. For maximising the molecular analyses with DNA immunoprecipitated, candidate  
399 genes were amplified in pairs through an optimized duplex-PCR protocol by using two different  
400 sets of primers having similar melting temperatures in a single reaction.  
401 RNase-Chromatin immunoprecipitation was performed essentially as described for ChIP but with  
402 an important modification: sheared chromatin was treated with RNase mix (Roche) for 1 h at 37 °C  
403 before immunoprecipitation.

404

#### 405 **Primers design and PCR amplification**

406 All PCR specific primers (18–25 mers with a minimum GC content of 50% and average T<sub>m</sub> of 60  
407 °C) (listed in Supplementary Table S1) were designed using the Invitrogen OligoPerfect™ designer



408 web tool and oligonucleotide sequences were screened using a BLAST search to confirm the  
409 specificity. PCR amplifications were performed with Platinum® Taq DNA Polymerase Kit  
410 (Invitrogen) according to the manufacturer's instructions.  
411 The thermal profile for PCR amplification of CLIP samples was as follows: initial denaturation at  
412 94 °C for 5 min, followed by 35 cycles of 94 °C for 30 s, 60 °C for 30 s, 72 °C for 30 s, and ending  
413 with a final extension at 72 °C for 7 min.

414 The thermal profile for duplex-PCR amplification of ChIP samples was as follows: initial  
415 denaturation at 94 °C for 5 min, followed by 28 cycles of 94 °C for 30 s, 60 °C for 30 s, 72 °C for  
416 30 s, and ending with a final extension at 72 °C for 7 min. The PCR products were analyzed by 2%  
417 agarose gel electrophoresis.

418

#### 419 **Total RNA extraction and qRT-PCR**

420 RNA samples from ovaries were isolated by Qiazol reagent (Qiagen) according to the  
421 manufacturer's instructions. The concentration and purity of RNAs were determined using  
422 NanoDrop 1000 Spectrophotometer (Thermo Scientific). 5 µg of total RNA was reverse transcribed  
423 using oligo dT and SuperScript Reverse Transcriptase III (Invitrogen) according to the  
424 manufacturer's protocol. The qPCR reactions were carried out with QuantiFast SYBR Green PCR  
425 Kit (Qiagen) according to manufacturer's protocol. Relative abundance of the different transcripts  
426 was determined using the  $2^{-\Delta\Delta C_t}$  method<sup>86</sup> using *rp49* transcript as control. qRT-PCR experiments  
427 were performed in three independent biological replicates; all reactions were run in triplicates in 96-  
428 well plates over 40 cycles of 95 °C for 15 s and 60 °C for 60 s in a two-step thermal cycle preceded  
429 by an initiation step of 95 °C for 10 min. Melting-curve analysis was performed on each sample to  
430 control for nonspecific amplification and primer dimer formation. Primer sequences were listed in  
431 Supplementary Table S1. Statistical significance was determined by Mann-Whitney tests using  
432 GraphPad Prism Software. A  $p$  value  $\leq 0.05$  was considered statistically significant.

433

434 **Actinomycin D treatment**

435 To assay for mRNA stability, ovaries dissected from 1-day-old females raised at lower temperature  
436 (18 °C) were treated with 20 µg/ml Actinomycin D in Schneider's medium with constant rocking at  
437 room temperature for 30 min (T0, sufficient to inhibit transcription as described in Jao and Salic<sup>87</sup>;  
438 total RNA was extracted at T0 and then T30 min, T60 min, T120 min. mRNA levels for *bam*, *nos*,  
439 *piwi* and *cup* were analyzed by qRT-PCR.

440

441

442

443

444

445

446

447

448

449

450

451

452

453

454

455

456

457

## 458 **References**

- 459 1 Lin, H. The stem-cell niche theory: lessons from flies. *Nat Rev Genet* 3, 931-940,  
460 doi:10.1038/nrg952 (2002).
- 461 2 Spradling, A., Drummond-Barbosa, D. & Kai, T. Stem cells find their niche. *Nature* 414,  
462 98-104, doi:10.1038/35102160 (2001).
- 463 3 Morrison, S. J. & Spradling, A. C. Stem cells and niches: mechanisms that promote stem  
464 cell maintenance throughout life. *Cell* 132, 598-611, doi:10.1016/j.cell.2008.01.038 (2008).
- 465 4 Fuchs, E. J. & Whartenby, K. A. Hematopoietic stem cell transplant as a platform for  
466 tumor immunotherapy. *Curr Opin Mol Ther* 6, 48-53 (2004).
- 467 5 Mahla, R. S. Stem Cells Applications in Regenerative Medicine and Disease Therapeutics.  
468 *Int J Cell Biol* 2016, 6940283, doi:10.1155/2016/6940283 (2016).
- 469 6 Shah, K. Stem cell-based therapies for tumors in the brain: are we there yet? *Neuro Oncol*  
470 18, 1066-1078, doi:10.1093/neuonc/now096 (2016).
- 471 7 Schofield, R. The relationship between the spleen colony-forming cell and the  
472 haemopoietic stem cell. *Blood Cells* 4, 7-25 (1978).
- 473 8 Fuller, M. T. & Spradling, A. C. Male and female *Drosophila* germline stem cells: two  
474 versions of immortality. *Science* 316, 402-404, doi:10.1126/science.1140861 (2007).
- 475 9 Spradling, A., Fuller, M. T., Braun, R. E. & Yoshida, S. Germline stem cells. *Cold Spring*  
476 *Harb Perspect Biol* 3, a002642, doi:10.1101/cshperspect.a002642 (2011).
- 477 10 Xie, T. et al. Interactions between stem cells and their niche in the *Drosophila* ovary. *Cold*  
478 *Spring Harb Symp Quant Biol* 73, 39-47, doi:10.1101/sqb.2008.73.014 (2008).
- 479 11 Singh, G. *Drosophila*'s contribution to stem cell research. *F1000Res* 4, 157,  
480 doi:10.12688/f1000research.6611.2 (2015).
- 481 12 Spradling, A. C. Germline cysts: communes that work. *Cell* 72, 649-651 (1993).

- 482 13 de Cuevas, M., Lilly, M. A. & Spradling, A. C. Germline cyst formation in *Drosophila*.  
483 *Annu Rev Genet* 31, 405-428, doi:10.1146/annurev.genet.31.1.405 (1997).
- 484 14 Cooley, L. & Theurkauf, W. E. Cytoskeletal functions during *Drosophila* oogenesis.  
485 *Science* 266, 590-596 (1994).
- 486 15 Forbes, A. J., Lin, H., Ingham, P. W. & Spradling, A. C. hedgehog is required for the  
487 proliferation and specification of ovarian somatic cells prior to egg chamber formation in  
488 *Drosophila*. *Development* 122, 1125-1135 (1996).
- 489 16 Margolis, J. & Spradling, A. Identification and behavior of epithelial stem cells in the  
490 *Drosophila* ovary. *Development* 121, 3797-3807 (1995).
- 491 17 Chen, D. & McKearin, D. M. A discrete transcriptional silencer in the *bam* gene  
492 determines asymmetric division of the *Drosophila* germline stem cell. *Development* 130, 1159-1170  
493 (2003).
- 494 18 McKearin, D. M. & Spradling, A. C. *bag-of-marbles*: a *Drosophila* gene required to  
495 initiate both male and female gametogenesis. *Genes Dev* 4, 2242-2251 (1990).
- 496 19 Song, X. et al. Bmp signals from niche cells directly repress transcription of a  
497 differentiation-promoting gene, *bag of marbles*, in germline stem cells in the *Drosophila* ovary.  
498 *Development* 131, 1353-1364, doi:10.1242/dev.01026 (2004).
- 499 20 Xie, T. & Spradling, A. C. *decapentaplegic* is essential for the maintenance and division  
500 of germline stem cells in the *Drosophila* ovary. *Cell* 94, 251-260 (1998).
- 501 21 Forbes, A. & Lehmann, R. *Nanos* and *Pumilio* have critical roles in the development and  
502 function of *Drosophila* germline stem cells. *Development* 125, 679-690 (1998).
- 503 22 Lin, H. & Spradling, A. C. A novel group of *pumilio* mutations affects the asymmetric  
504 division of germline stem cells in the *Drosophila* ovary. *Development* 124, 2463-2476 (1997).
- 505 23 Wang, Z. & Lin, H. *Nanos* maintains germline stem cell self-renewal by preventing  
506 differentiation. *Science* 303, 2016-2019, doi:10.1126/science.1093983 (2004).

- 507 24 Sonoda, J. & Wharton, R. P. Recruitment of Nanos to hunchback mRNA by Pumilio.  
508 *Genes Dev* 13, 2704-2712 (1999).
- 509 25 Zamore, P. D., Williamson, J. R. & Lehmann, R. The Pumilio protein binds RNA through  
510 a conserved domain that defines a new class of RNA-binding proteins. *RNA* 3, 1421-1433 (1997).
- 511 26 Zhang, B. et al. A conserved RNA-binding protein that regulates sexual fates in the *C.*  
512 *elegans* hermaphrodite germ line. *Nature* 390, 477-484, doi:10.1038/37297 (1997).
- 513 27 Wickens, M., Bernstein, D. S., Kimble, J. & Parker, R. A PUF family portrait: 3'UTR  
514 regulation as a way of life. *Trends Genet* 18, 150-157 (2002).
- 515 28 Kimble, J. & Crittenden, S. L. Controls of germline stem cells, entry into meiosis, and the  
516 sperm/oocyte decision in *Caenorhabditis elegans*. *Annu Rev Cell Dev Biol* 23, 405-433,  
517 doi:10.1146/annurev.cellbio.23.090506.123326 (2007).
- 518 29 Murata, Y. & Wharton, R. P. Binding of pumilio to maternal hunchback mRNA is  
519 required for posterior patterning in *Drosophila* embryos. *Cell* 80, 747-756 (1995).
- 520 30 Asaoka-Taguchi, M., Yamada, M., Nakamura, A., Hanyu, K. & Kobayashi, S. Maternal  
521 Pumilio acts together with Nanos in germline development in *Drosophila* embryos. *Nat Cell Biol* 1,  
522 431-437, doi:10.1038/15666 (1999).
- 523 31 Forstemann, K. et al. Normal microRNA maturation and germ-line stem cell maintenance  
524 requires Loquacious, a double-stranded RNA-binding domain protein. *PLoS Biol* 3, e236,  
525 doi:10.1371/journal.pbio.0030236 (2005).
- 526 32 Jin, Z. & Xie, T. Dcr-1 maintains *Drosophila* ovarian stem cells. *Curr Biol* 17, 539-544,  
527 doi:10.1016/j.cub.2007.01.050 (2007).
- 528 33 Park, J. K., Liu, X., Strauss, T. J., McKearin, D. M. & Liu, Q. The miRNA pathway  
529 intrinsically controls self-renewal of *Drosophila* germline stem cells. *Curr Biol* 17, 533-538,  
530 doi:10.1016/j.cub.2007.01.060 (2007).
- 531 34 Yang, L. et al. Argonaute 1 regulates the fate of germline stem cells in *Drosophila*.  
532 *Development* 134, 4265-4272, doi:10.1242/dev.009159 (2007).

- 533 35 Cox, D. N., Chao, A. & Lin, H. piwi encodes a nucleoplasmic factor whose activity  
534 modulates the number and division rate of germline stem cells. *Development* 127, 503-514 (2000).
- 535 36 Vagin, V. V. et al. A distinct small RNA pathway silences selfish genetic elements in the  
536 germline. *Science* 313, 320-324, doi:10.1126/science.1129333 (2006).
- 537 37 Ma, X. et al. Piwi is required in multiple cell types to control germline stem cell lineage  
538 development in the *Drosophila* ovary. *PLoS One* 9, e90267, doi:10.1371/journal.pone.0090267  
539 (2014).
- 540 38 Ma, X. et al. Aubergine Controls Germline Stem Cell Self-Renewal and Progeny  
541 Differentiation via Distinct Mechanisms. *Dev Cell* 41, 157-169 e155,  
542 doi:10.1016/j.devcel.2017.03.023 (2017).
- 543 39 Maines, J. Z., Park, J. K., Williams, M. & McKearin, D. M. Stonewalling *Drosophila* stem  
544 cell differentiation by epigenetic controls. *Development* 134, 1471-1479, doi:10.1242/dev.02810  
545 (2007).
- 546 40 Buszczak, M., Paterno, S. & Spradling, A. C. *Drosophila* stem cells share a common  
547 requirement for the histone H2B ubiquitin protease scrawny. *Science* 323, 248-251,  
548 doi:10.1126/science.1165678 (2009).
- 549 41 Eliazar, S., Shalaby, N. A. & Buszczak, M. Loss of lysine-specific demethylase 1  
550 nonautonomously causes stem cell tumors in the *Drosophila* ovary. *Proc Natl Acad Sci U S A* 108,  
551 7064-7069, doi:10.1073/pnas.1015874108 (2011).
- 552 42 Wang, X. et al. Histone H3K9 trimethylase Eggless controls germline stem cell  
553 maintenance and differentiation. *PLoS Genet* 7, e1002426, doi:10.1371/journal.pgen.1002426  
554 (2011).
- 555 43 Xi, R. & Xie, T. Stem cell self-renewal controlled by chromatin remodeling factors.  
556 *Science* 310, 1487-1489, doi:10.1126/science.1120140 (2005).
- 557 44 James, T. C. & Elgin, S. C. Identification of a nonhistone chromosomal protein associated  
558 with heterochromatin in *Drosophila melanogaster* and its gene. *Mol Cell Biol* 6, 3862-3872 (1986).

- 559 45 James, T. C. et al. Distribution patterns of HP1, a heterochromatin-associated nonhistone  
560 chromosomal protein of *Drosophila*. *Eur J Cell Biol* 50, 170-180 (1989).
- 561 46 Eissenberg, J. C. et al. Mutation in a heterochromatin-specific chromosomal protein is  
562 associated with suppression of position-effect variegation in *Drosophila melanogaster*. *Proc Natl*  
563 *Acad Sci U S A* 87, 9923-9927 (1990).
- 564 47 Fanti, L., Giovinazzo, G., Berloco, M. & Pimpinelli, S. The heterochromatin protein 1  
565 prevents telomere fusions in *Drosophila*. *Mol Cell* 2, 527-538 (1998).
- 566 48 Perrini, B. et al. HP1 controls telomere capping, telomere elongation, and telomere  
567 silencing by two different mechanisms in *Drosophila*. *Mol Cell* 15, 467-476,  
568 doi:10.1016/j.molcel.2004.06.036 (2004).
- 569 49 Piacentini, L., Fanti, L., Berloco, M., Perrini, B. & Pimpinelli, S. Heterochromatin protein  
570 1 (HP1) is associated with induced gene expression in *Drosophila* euchromatin. *J Cell Biol* 161,  
571 707-714, doi:10.1083/jcb.200303012 (2003).
- 572 50 De Lucia, F., Ni, J. Q., Vaillant, C. & Sun, F. L. HP1 modulates the transcription of cell-  
573 cycle regulators in *Drosophila melanogaster*. *Nucleic Acids Res* 33, 2852-2858,  
574 doi:10.1093/nar/gki584 (2005).
- 575 51 Vakoc, C. R., Mandat, S. A., Olenchock, B. A. & Blobel, G. A. Histone H3 lysine 9  
576 methylation and HP1gamma are associated with transcription elongation through mammalian  
577 chromatin. *Mol Cell* 19, 381-391, doi:10.1016/j.molcel.2005.06.011 (2005).
- 578 52 Lin, C. H. et al. Heterochromatin protein 1a stimulates histone H3 lysine 36 demethylation  
579 by the *Drosophila* KDM4A demethylase. *Mol Cell* 32, 696-706, doi:10.1016/j.molcel.2008.11.008  
580 (2008).
- 581 53 Piacentini, L. et al. Heterochromatin protein 1 (HP1a) positively regulates euchromatic  
582 gene expression through RNA transcript association and interaction with hnRNPs in *Drosophila*.  
583 *PLoS Genet* 5, e1000670, doi:10.1371/journal.pgen.1000670 (2009).

- 584 54 Kwon, S. H. et al. Heterochromatin protein 1 (HP1) connects the FACT histone chaperone  
585 complex to the phosphorylated CTD of RNA polymerase II. *Genes Dev* 24, 2133-2145,  
586 doi:10.1101/gad.1959110 (2010).
- 587 55 Xing, Y. & Li, W. X. Heterochromatin components in germline stem cell maintenance.  
588 *Sci Rep* 5, 17463, doi:10.1038/srep17463 (2015).
- 589 56 Zeng, A. et al. Heterochromatin protein 1 promotes self-renewal and triggers regenerative  
590 proliferation in adult stem cells. *J Cell Biol* 201, 409-425, doi:10.1083/jcb.201207172 (2013).
- 591 57 Abe, K. et al. Loss of heterochromatin protein 1 gamma reduces the number of primordial  
592 germ cells via impaired cell cycle progression in mice. *Biol Reprod* 85, 1013-1024,  
593 doi:10.1095/biolreprod.111.091512 (2011).
- 594 58 Brown, J. P. et al. HP1gamma function is required for male germ cell survival and  
595 spermatogenesis. *Epigenetics Chromatin* 3, 9, doi:10.1186/1756-8935-3-9 (2010).
- 596 59 Yan, D. et al. A regulatory network of *Drosophila* germline stem cell self-renewal. *Dev*  
597 *Cell*. 28, 459-473, doi: 10.1016/j.devcel.2014.01.020 (2014).
- 598 60 Rorth, P. Gal4 in the *Drosophila* female germline. *Mech Dev* 78, 113-118 (1998).
- 599 61 Dietzl, G. et al. A genome-wide transgenic RNAi library for conditional gene inactivation  
600 in *Drosophila*. *Nature* 448, 151-6, doi:10.1038/nature05954 (2007).
- 601 62 Petrella, L. N., Smith-Leiker, T. & Cooley, L. The Ovhts polyprotein is cleaved to produce  
602 fusome and ring canal proteins required for *Drosophila* oogenesis. *Development* 134, 703-712,  
603 doi:10.1242/dev.02766 (2007).
- 604 63 Lasko, P. F. & Ashburner, M. The product of the *Drosophila* gene vasa is very similar to  
605 eukaryotic initiation factor-4A. *Nature* 335, 611-617, doi:10.1038/335611a0 (1988).
- 606 64 Raz, E. The function and regulation of vasa-like genes in germ-cell development. *Genome*  
607 *Biol* 1, REVIEWS1017, doi:10.1186/gb-2000-1-3-reviews1017 (2000).
- 608 65 Hudson, A.M. & Cooley L. Methods for studying oogenesis. *Methods* 68, 207-217, doi:  
609 10.1016/j.ymeth.2014.01.005 (2014).



610 66 Zhu, C.H. & Xie, T. Clonal expansion of ovarian germline stem cells during niche formation  
611 in *Drosophila*. *Development* 130, 2579-2588, doi: 10.1242/dev.00499 (2003).

612 67 Deng, W. & Lin, H. Spectrosomes and fusomes anchor mitotic spindles during  
613 asymmetric germ cell divisions and facilitate the formation of a polarized microtubule array for  
614 oocyte specification in *Drosophila*. *Dev Biol* 189, 79-94, doi:10.1006/dbio.1997.8669 (1997).

615 68 McKearin, D. & Ohlstein, B. A role for the *Drosophila* bag-of-marbles protein in the  
616 differentiation of cystoblasts from germline stem cells. *Development* 121, 2937-2947 (1995).

617 69 Ohlstein, B. & McKearin, D. Ectopic expression of the *Drosophila* Bam protein eliminates  
618 oogenic germline stem cells. *Development* 124, 3651-3662 (1997).

619 70 Cortes, A. et al. DDP1, a single-stranded nucleic acid-binding protein of *Drosophila*,  
620 associates with pericentric heterochromatin and is functionally homologous to the yeast Scp160p,  
621 which is involved in the control of cell ploidy. *EMBO J* 18, 3820-3833,  
622 doi:10.1093/emboj/18.13.3820 (1999).

623 71 Haynes, S. R., Johnson, D., Raychaudhuri, G. & Beyer, A. L. The *Drosophila* Hrb87F  
624 gene encodes a new member of the A and B hnRNP protein group. *Nucleic Acids Res* 19, 25-31  
625 (1991).

626 72 Amero, SA. Elgin, SCR. Beyer, AL. A unique ribonucleoprotein complex assembles  
627 preferentially on ecdysone-responsive sites in *Drosophila melanogaster*. *Genes Dev* 5, 188-200,  
628 doi: 10.1128/MCB.13.9.5323 (1991).

629 73 Brimacombe, R., Stiege, W., Kyriatsoulis, A. & Maly, P. Intra-RNA and RNA-protein  
630 cross-linking techniques in *Escherichia coli* ribosomes. *Methods Enzymol* 164, 287-309 (1988).

631 74 Ule, J. et al. CLIP identifies Nova-regulated RNA networks in the brain. *Science* 302,  
632 1212-1215, doi:10.1126/science.1090095 (2003).

633 75 Pek, J. W., Osman, I., Tay, M. L. & Zheng, R. T. Stable intronic sequence RNAs have  
634 possible regulatory roles in *Drosophila melanogaster*. *J Cell Biol* 211, 243-251,  
635 doi:10.1083/jcb.201507065 (2015).

- 636 76 Verrotti, A. C. & Wharton, R. P. Nanos interacts with cup in the female germline of  
637 *Drosophila*. *Development* 127, 5225-5232 (2000).
- 638 77 Epstein, A. M., Bauer, C. R., Ho, A., Bosco, G. & Zarnescu, D. C. *Drosophila* Fragile X  
639 protein controls cellular proliferation by regulating cbl levels in the ovary. *Dev Biol* 330, 83-92,  
640 doi:10.1016/j.ydbio.2009.03.011 (2009).
- 641 78 Xie, T. Control of germline stem cell self-renewal and differentiation in the *Drosophila*  
642 ovary: concerted actions of niche signals and intrinsic factors. *Wiley Interdiscip Rev Dev Biol* 2,  
643 261-273, doi:10.1002/wdev.60 (2013).
- 644 79 Huertas, D., Cortes, A., Casanova, J. & Azorin, F. *Drosophila* DDP1, a multi-KH-domain  
645 protein, contributes to centromeric silencing and chromosome segregation. *Curr Biol* 14, 1611-  
646 1620, doi:10.1016/j.cub.2004.09.024 (2004).
- 647 80 Singh, A. K. & Lakhotia, S. C. The hnRNP A1 homolog Hrp36 is essential for normal  
648 development, female fecundity, omega speckle formation and stress tolerance in *Drosophila*  
649 *melanogaster*. *J Biosci* 37, 659-678 (2012).
- 650 81 Yan, D. & Perrimon, N. *spenito* is required for sex determination in *Drosophila*  
651 *melanogaster*. *Proc Natl Acad Sci U S A* 112, 11606-11611, doi:10.1073/pnas.1515891112 (2015).
- 652 82 Grieder, N. C., de Cuevas, M. & Spradling, A. C. The fusome organizes the microtubule  
653 network during oocyte differentiation in *Drosophila*. *Development* 127, 4253-4264 (2000).
- 654 83 Pisano, C. Bonaccorsi, S. Gatti, M. The kl-3 loop of the Y chromosome of *Drosophila*  
655 binds a tektin-like protein. *Genetics* 133, 569-579 (1993).
- 656 84 Moore, M. J. et al. Mapping Argonaute and conventional RNA-binding protein  
657 interactions with RNA at single-nucleotide resolution using HITS-CLIP and CIMS analysis. *Nat*  
658 *Protoc* 9, 263-293, doi:10.1038/nprot.2014.012 (2014).
- 659 85 Menet, J. S., Abruzzi, K. C., Desrochers, J., Rodriguez, J. & Rosbash, M. Dynamic PER  
660 repression mechanisms in the *Drosophila* circadian clock: from on-DNA to off-DNA. *Genes Dev*  
661 24, 358-367, doi:10.1101/gad.1883910 (2010).

662 86 Livak, K. J. & Schmittgen, T. D. Analysis of relative gene expression data using real-time  
663 quantitative PCR and the 2(-Delta Delta C(T)) Method. *Methods* 25, 402-408,  
664 doi:10.1006/meth.2001.1262 (2001).

665 87 Jao, C. Y. & Salic, A. Exploring RNA transcription and turnover in vivo by using click  
666 chemistry. *Proc Natl Acad Sci U S A* 105, 15779-15784, doi:10.1073/pnas.0808480105 (2008).

## 667 **Acknowledgments**

668 We are grateful to S. Pimpinelli and C. Vincenzi for critical reading of the manuscript. We would  
669 like to thank S. Caristi for assistance with confocal image acquisition, B. Wakimoto, P. Dimitri and  
670 Developmental Studies Hybridoma Bank at the University of Iowa, for antibodies. We would like  
671 to thank also V. Palumbo, Bloomington *Drosophila* Stock Center and Vienna *Drosophila* RNAi  
672 Center for kindly providing fly stocks.

673

## 674 **Author contributions**

675 A.M.C. and U.C. contributed to experimental design, performed, and analyzed all experiments; L.F.  
676 contributed to data analysis. L.P. designed, analyzed, supervised all experiments and wrote the  
677 manuscript. All authors reviewed the manuscript.

678

## 679 **Additional Information**

680 **Competing Interests:** The authors declare no competing interests.

681

682

683

684

685

686

## 687 **Figure Legends**

688

689 **Figure 1.** HP1 is required for correct ovarian development.

690 **(a)** Wild type ovariole stained for DNA (red) and HP1 (green). Arrows indicate HP1 concentrated

691 at domains of constitutive heterochromatin. Karyosome is identified by a white dashed circle.

692 Dashed box is magnified in the right panel. **(b, c)** HP1 depleted ovaries stained for Vasa (green) and

693 DNA (red). All ovarioles show an altered ovarian morphology, consisting in germaria completely

694 empty **(b)** or germaria with only few germ cells **(c)**. **(d)** Developing wild-type ovaries obtained

695 from newly eclosed females stained for Vasa (green) and DNA (red).

696

697 **Figure 2.** HP1 is required during the earliest stages of oogenesis at the transitional period of pupal

698 stage. **(a)** Developing ovaries obtained from female wandering third-instar larvae stained for Vasa

699 (green) and DNA (red). **(b)** Developing ovaries obtained from 72-96 h old pupae stained for Vasa

700 (green) and DNA (red).

701

702 **Figure 3.** Loss of HP1 Causes a Complex GSC Phenotype.

703 **(a)** Representative images of each phenotypic class obtained from pupal HP1-depleted germaria

704 (*nos-G4>HP1<sup>RNAi</sup>*) stained for Vasa (red) and  $\alpha$ -Spectrin (green). **(b)** Quantification of the

705 prevalence of each phenotypic class in HP1 depleted pupal ovaries; the total number of germaria

706 scored is shown within each bar. E, empty germaria; S, germaria with spectrosomes only; S+F,

707 germaria with germ cells containing both spectrosomes and fusomes; F, germaria with only fusome-

708 containing germ cells. **(c)** Double-staining immunofluorescence on control (*nos-G4/+*) and HP1

709 depleted (*nos-G4>HP1<sup>RNAi</sup>*) pupal ovaries for  $\alpha$ -Spectrin (green) and PH3 (red). The white asterisk

710 indicates dividing follicle stem cell (FSC). **(d)** Quantification of PH3-positive cystoblast in HP1

711 knockdown pupal ovaries. Statistical significance was determined by Fisher's exact test ( $***p <$

712 0.001). (e) Immunofluorescence on control (*nos-G4/+*) and HP1 depleted (*nos-G4>HP1<sup>RNAi</sup>*) pupal  
713 ovaries for cleaved Caspase-3 (green) and DNA (red).

714

715 **Figure 4.** HP1 regulates *bam* mRNAs in a post-transcriptional manner.

716 (a) qRT-PCR analysis showing that HP1 depleted pupal ovaries express significantly less *bam*  
717 transcript respect to the control. Fold-changes in RNA levels relative to the control were normalized  
718 to *rp49* levels. Error bars indicate  $\pm$ SEM from three biological replicates ( $***p < 0.001$ ). (b)

719 Double immunofluorescence on control (*nos-G4/+*) and HP1 depleted (*nos-G4>HP1<sup>RNAi</sup>*) pupal  
720 ovaries for Vasa and Bam. (c) RT-PCR analysis of RNAs immunoprecipitated with  $\alpha$ -HP1 (HP1

721 CLIP sample) in newly eclosed females ovaries. The PCR data shown here are representative of  
722 three independent CLIP experiments. The full-length versions of the cropped gels are reported in

723 Supplementary Fig. S7a. (d) Chromatin immunoprecipitation (ChIP) analysis of HP1 occupancy at  
724 the *bam* promoter region (bam Silencer Element) and coding sequence in newly eclosed female  
725 ovaries. The RNase sensitivity of this association was tested by pre-treating the extract with a  
726 combination of RNase A and RNase T1 (right panel). Het-A was used as a positive control to check  
727 whether the ChIP experiments were working. PCR reactions were carried out on 1% input DNA.

728 The PCR data shown here are representative of three independent ChIP experiments. The full-  
729 length versions of the cropped gels are reported in Supplementary Fig. S7b, c. (e) qRT-PCR

730 analysis of *bam* mRNA transcript at different times after blockage of transcription by Actinomycin  
731 D treatment. The green line and the red line indicate the *bam* transcript amount respectively in the  
732 control (*nos-G4/+*) and HP1-depleted (*nos-G4>HP1<sup>RNAi</sup>*) ovaries from 1-day-old females. Total  
733 RNA was isolated at the indicated times (0, 30 min, 60 min and 120 min). The values shown are  
734 averages  $\pm$ SEM of three biological replicates. The dashed lines represent the best fit regression of  
735 all data point and the slopes are shown on the graph. For each genotype, all data point vs T0  
736 was statistically evaluated by one-sample t-test ( $**p < 0.01$ ).

737

738 **Figure 5.** Heat-shock induced *bam* can only partially rescue the phenotypic defects induced by HP1  
739 knockdown.

740 **(a,b)** Staining for Vasa (green) and DNA (red) on whole mounts adult ovaries from *nos-*  
741 *G4>HP1<sup>RNAi</sup>* **(a)** and *nos-G4>HP1<sup>RNAi</sup>; hs-bam* **(b)** females. **(b)** The dashed white box in the left  
742 panel is magnified in the right panel. **(c)** Quantification of ovarioles containing developing egg  
743 chambers in heat shocked HP1 depleted females carrying or not the *P[hs-bam]* transgene (454 and  
744 784 ovarioles scored for *nos-G4>HP1<sup>RNAi</sup>* and *nos-G4>HP1<sup>RNAi</sup>; hs-bam*, respectively). Statistical  
745 significance was determined by Fisher's exact test (\*\*\*\* $p < 0.0001$ ). **(d)** Staining for Spectrin  
746 (green) and DAPI (red) on germaria obtained from *bam-G4>HP1<sup>RNAi</sup>* females.

747

748

749 **Figure 6.** HP1 is required for GSC self-renewal.

750 **(a)** Bar graph showing relative quantification of mRNA encoding GSCs key factors in HP1-  
751 depleted or control pupal ovaries. Error bars indicate  $\pm$ SEM from three biological replicates (\*\* $p <$   
752 0.01, \* $p < 0.05$ ). **(b)** RT-PCR analysis of RNAs immunoprecipitated with  $\alpha$ -HP1 (HP1 CLIP  
753 sample) in ovarian extract from newly eclosed females. The PCR data shown here are  
754 representative of three independent CLIP experiments. The full-length versions of the cropped gels  
755 are reported in Supplementary Fig. S7a. **(c)** Chromatin immunoprecipitation (ChIP) analysis of HP1  
756 occupancy at *cup*, *nos*, *piwi* and *vasa* genes in newly eclosed female ovaries. The RNase sensitivity  
757 of this association was tested by pretreating the extract with a combination of RNase A and RNase  
758 T1 (right panel). Het-A was used as a positive control. PCR reactions were carried out on 1% input  
759 DNA. The PCR data shown here is representative of three independent ChIP experiments. The full-  
760 length versions of the cropped gels are reported in Supplementary Fig. S7b, c. **(d)** Time course  
761 degradation assay of *cup*, *nos*, and *piwi* RNAs measured by qRT-PCR in control (*nos-G4/+*) or HP1  
762 depleted (*nos-G4>HP1<sup>RNAi</sup>*) ovaries from 1-day-old females. Total RNA was isolated at the  
763 indicated times (0, 30 min, 60 min and 120 min). The values shown are averages  $\pm$ SEM of three

764 biological replicates. The dashed lines represent the best fit regression of all data point and the  
765 slopes are shown on the graph. For each genotype, all data point vs T0 was statistically evaluated by  
766 one-sample t-test ( $*p < 0.05$ ).

767

768

Figure 1

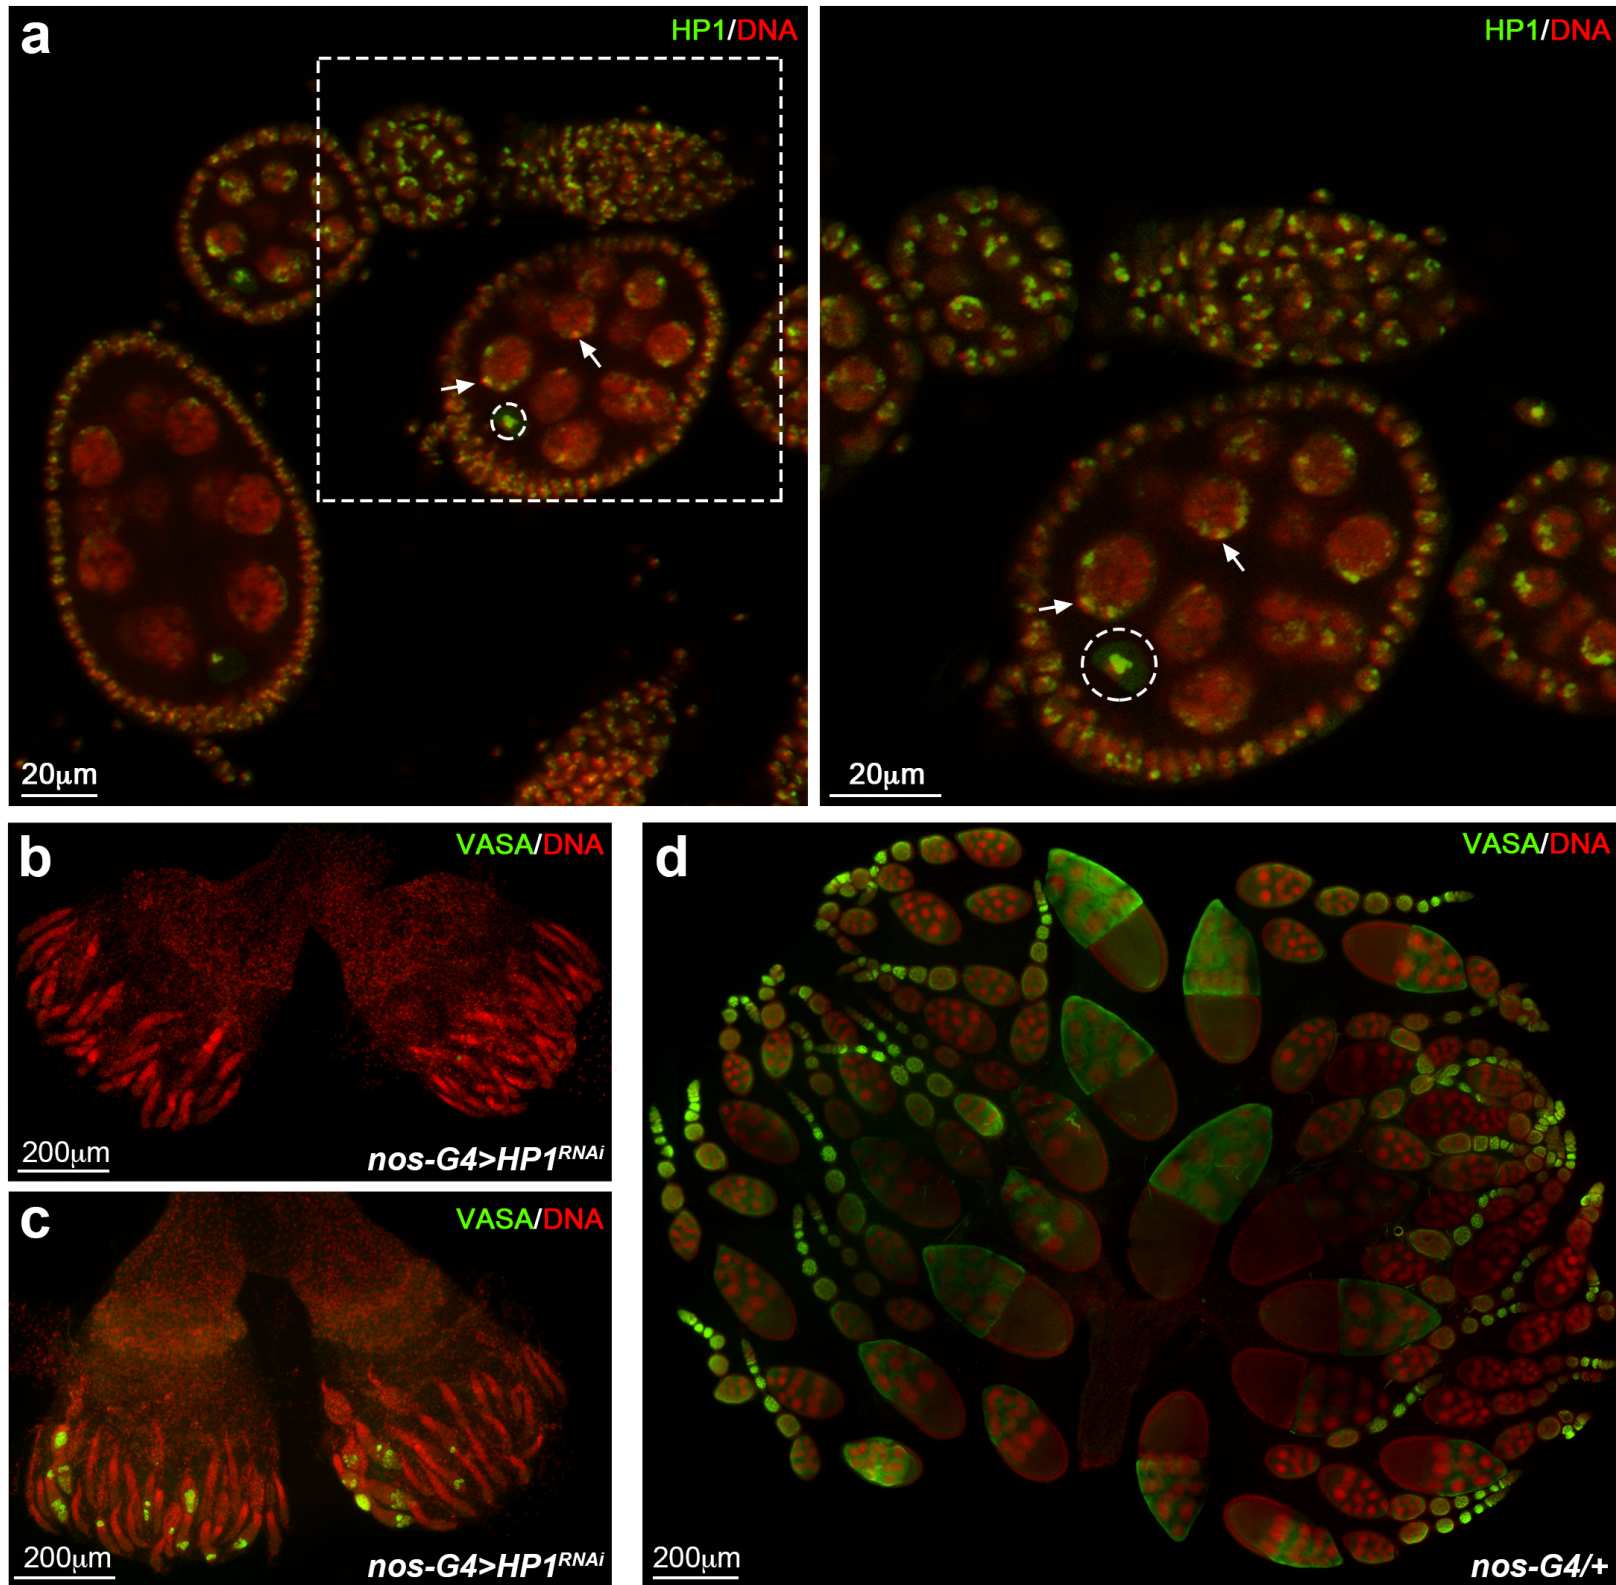



Figure 2

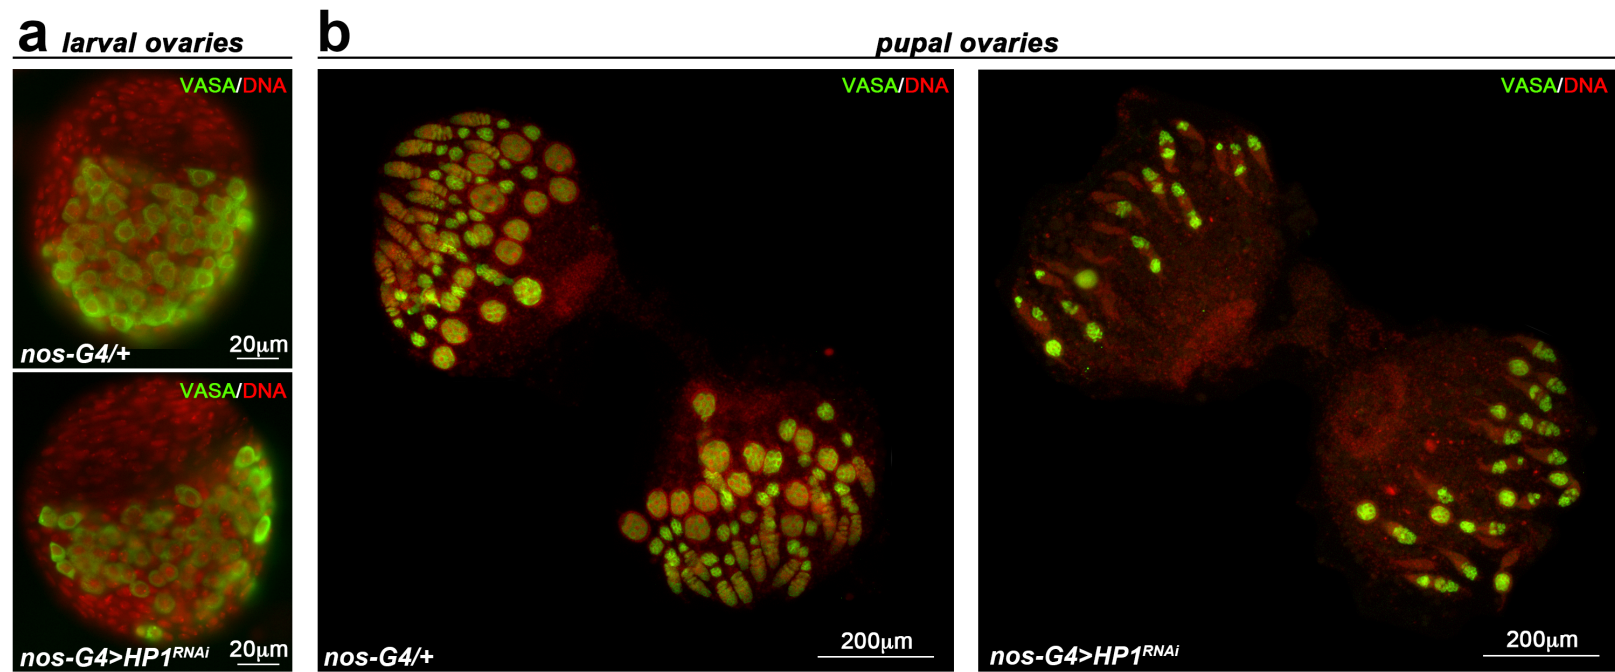

Figure 3

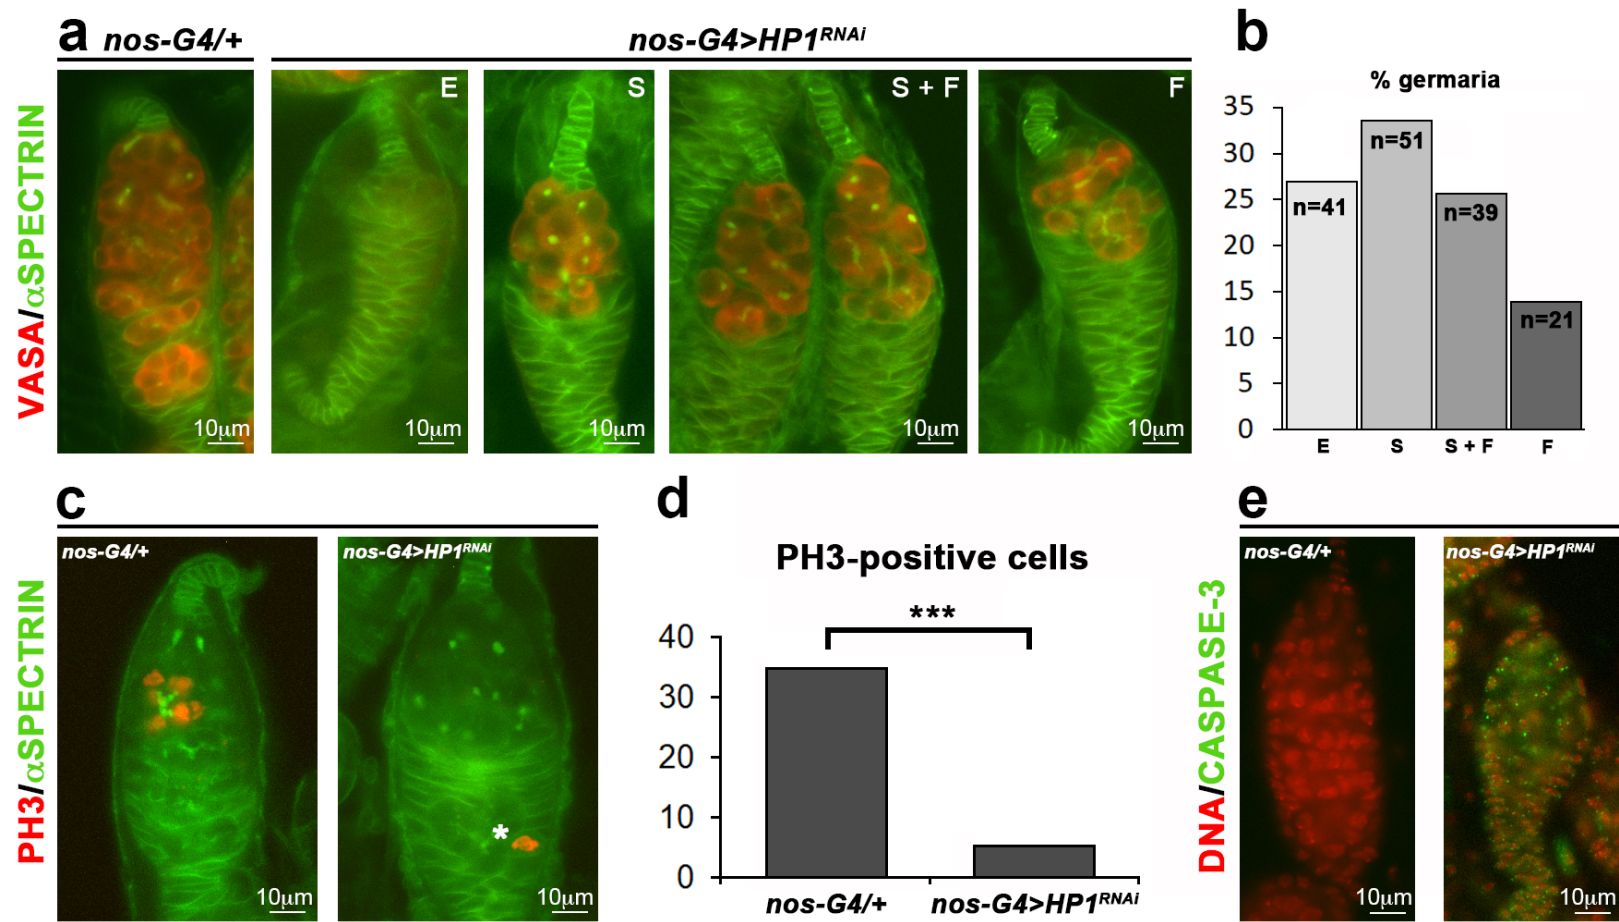

Figure 4

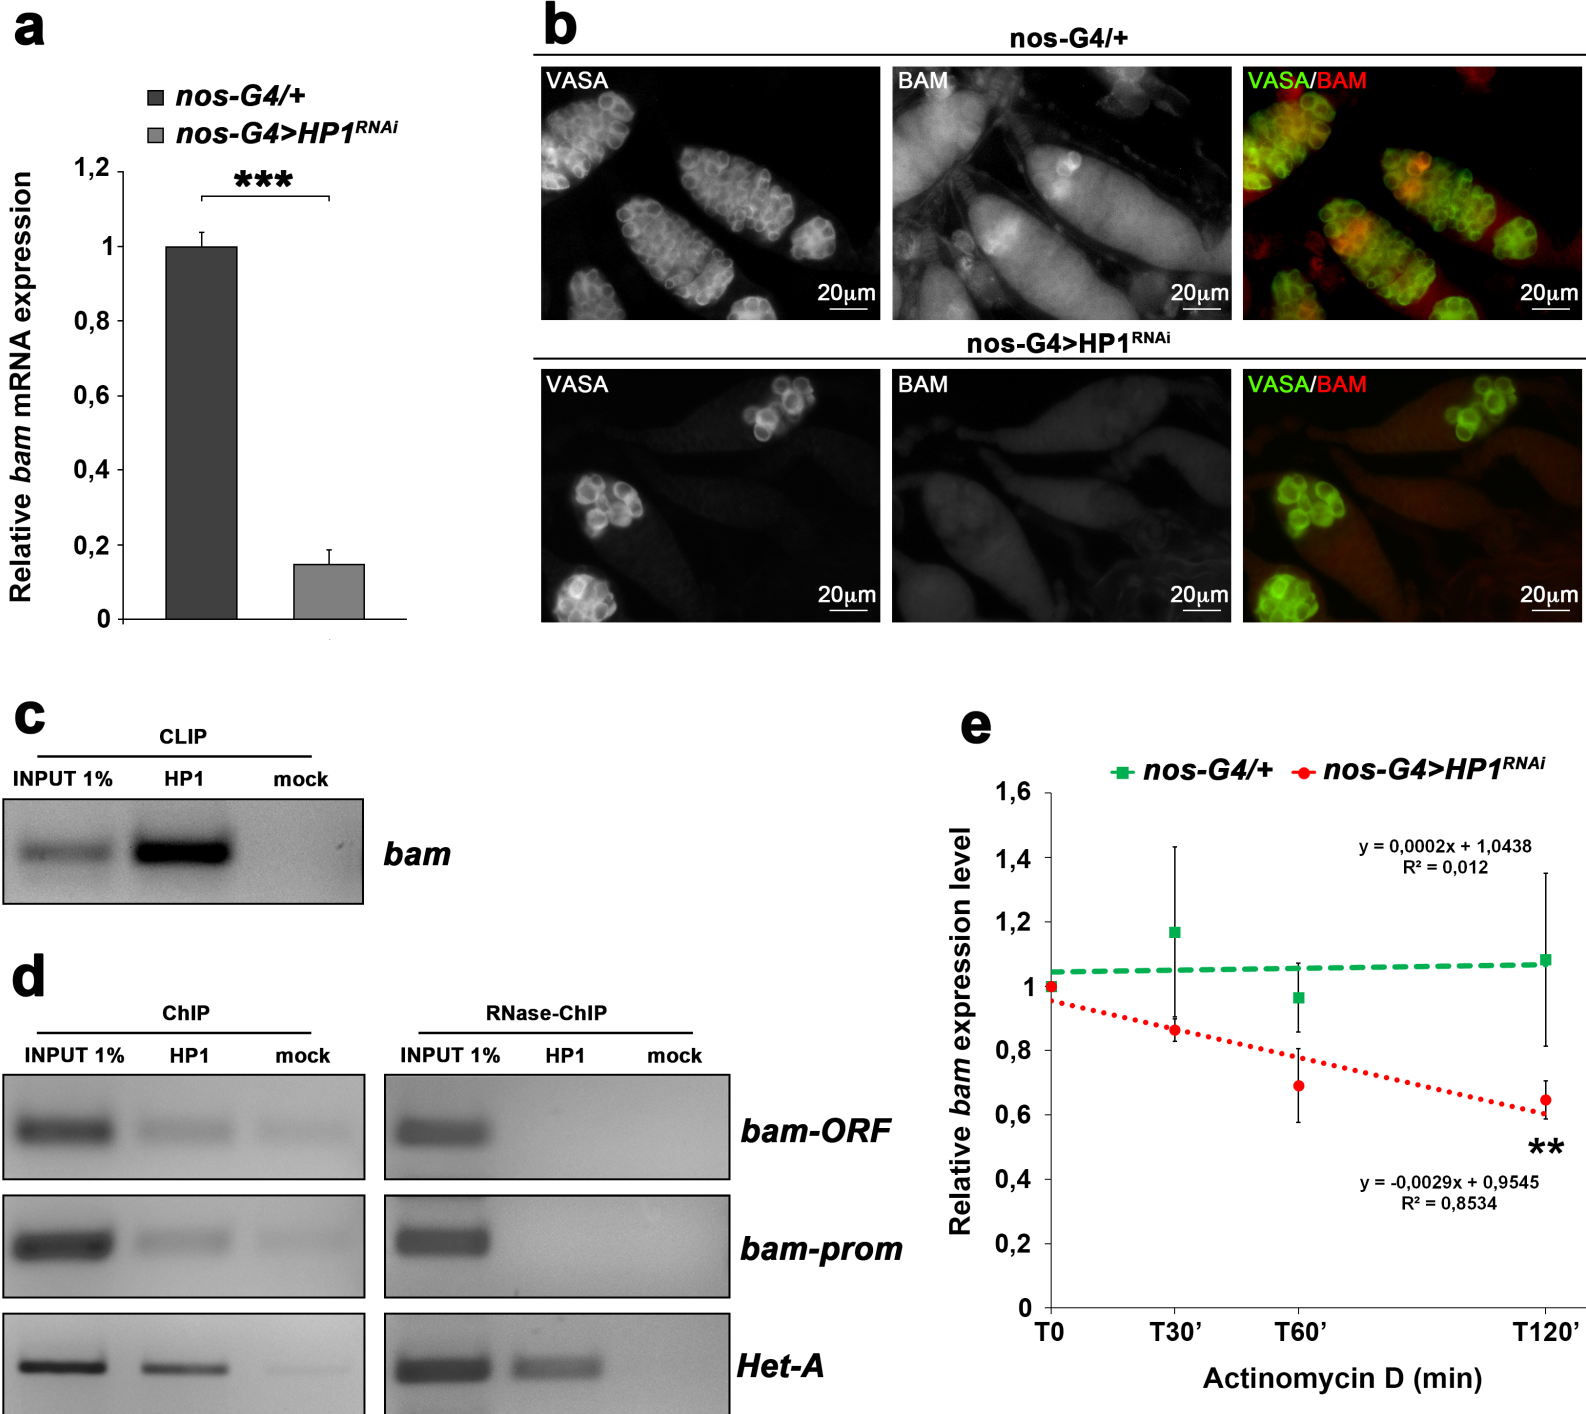

Figure 5

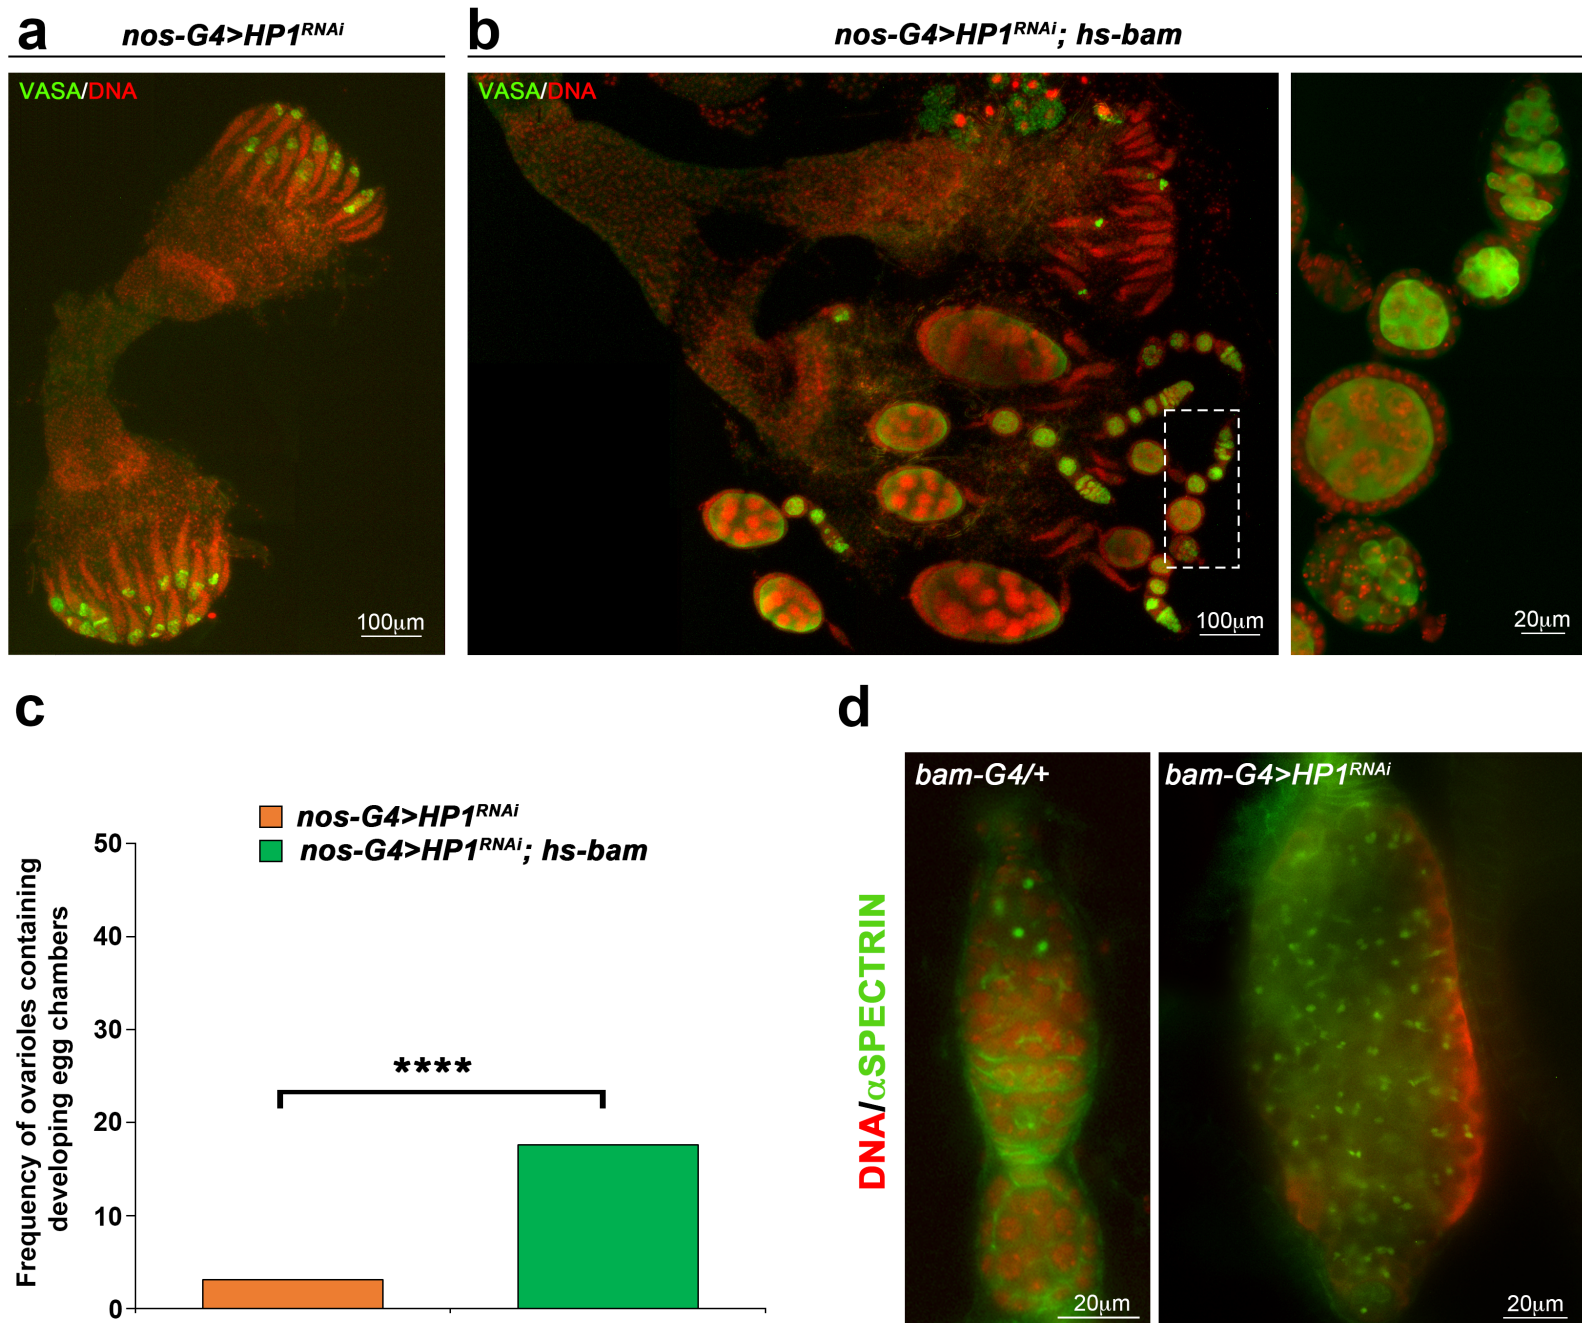

Figure 6

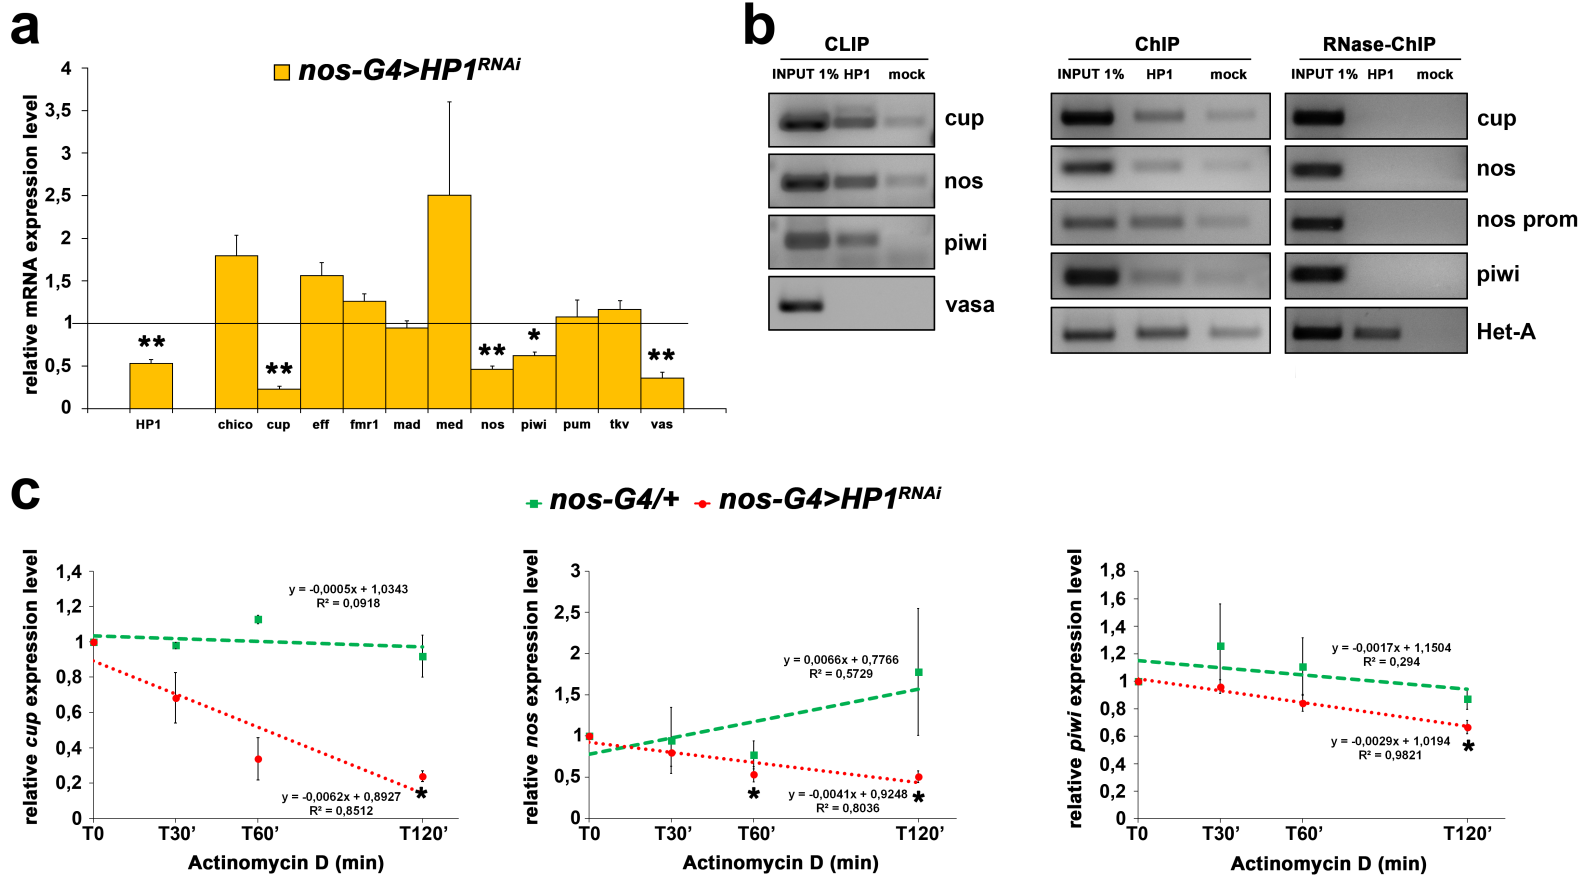

Source: https://www.biorxiv.org/content/10.1101/474833v1.full.pdf
